# Supplementary material
Source: Copernicus journal article supplement (doi:10.5194/essd-18-2749-2026)
Supplement: Supplementary file 1 [file essd-18-2749-2026-supplement.pdf]

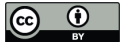

*Supplement of*

**Deriving regional and point source nitrogen oxides emissions in China from TROPOMI using the directional derivative approach with nonlinear chemical lifetime fitting**

Ling Chen et al.

*Correspondence to:* Zhaonan Cai (caizhaonan@mail.iap.ac.cn)

The copyright of individual parts of the supplement might differ from the article licence.

**Table S1. Comparison of three DDA-based chemical lifetime ( $\tau$ ) fitting parameters for EN.**

Test1: fixed  $f$  and single  $\tau$ ;

Test2: variable  $f$  and single  $\tau$ ;

Control: variable  $f$  and nonlinear  $\tau$ , i.e., this study.

- 5 All values are monthly means: for test1 and test2, the monthly mean is calculated from a single fit over the subregion; for the control setup, the monthly mean is calculated by averaging the piecewise bin results for the subregion. The bottom row shows the mean over the entire study period.

| parameters | R <sup>2</sup> |       |       | RMSE ( $\mu\text{mol m}^{-2} \text{s}^{-1}$ ) |       |       | $\tau$ (h) |       |       |
|------------|----------------|-------|-------|-----------------------------------------------|-------|-------|------------|-------|-------|
|            | month          | Test1 | Test2 | Control                                       | Test1 | Test2 | Control    | Test1 | Test2 |
| 1          | 0.71           | 0.77  | 0.66  | 0.97                                          | 1.19  | 0.83  | 14.51      | 11.86 | 6.19  |
| 2          | 0.68           | 0.65  | 0.57  | 0.72                                          | 0.86  | 0.53  | 12.13      | 11.90 | 5.10  |
| 3          | 0.59           | 0.57  | 0.29  | 0.72                                          | 0.81  | 0.61  | 15.93      | 15.87 | 8.38  |
| 4          | 0.53           | 0.56  | 0.45  | 0.70                                          | 0.73  | 0.44  | 12.48      | 11.88 | 5.94  |
| 5          | 0.53           | 0.53  | 0.42  | 0.57                                          | 0.57  | 0.37  | 12.70      | 12.15 | 6.41  |
| 6          | 0.50           | 0.49  | 0.45  | 0.52                                          | 0.51  | 0.25  | 20.71      | 21.45 | 6.52  |
| 7          | 0.66           | 0.74  | 0.42  | 0.46                                          | 0.42  | 0.26  | 9.88       | 7.99  | 6.41  |
| 8          | 0.33           | 0.36  | 0.39  | 0.51                                          | 0.48  | 0.25  | 32.60      | 31.14 | 6.60  |
| 9          | 0.28           | 0.30  | 0.45  | 0.62                                          | 0.61  | 0.31  | 25.74      | 22.84 | 5.25  |
| 10         | 0.57           | 0.60  | 0.52  | 0.70                                          | 0.76  | 0.40  | 19.60      | 18.31 | 7.13  |
| 11         | 0.32           | 0.43  | 0.49  | 1.14                                          | 1.29  | 0.80  | 27.48      | 21.40 | 6.36  |
| 12         | 0.89           | 0.93  | 0.68  | 0.69                                          | 0.85  | 0.75  | 11.91      | 9.96  | 7.73  |
| mean       | 0.55           | 0.58  | 0.49  | 0.69                                          | 0.76  | 0.51  | 17.97      | 16.40 | 6.49  |

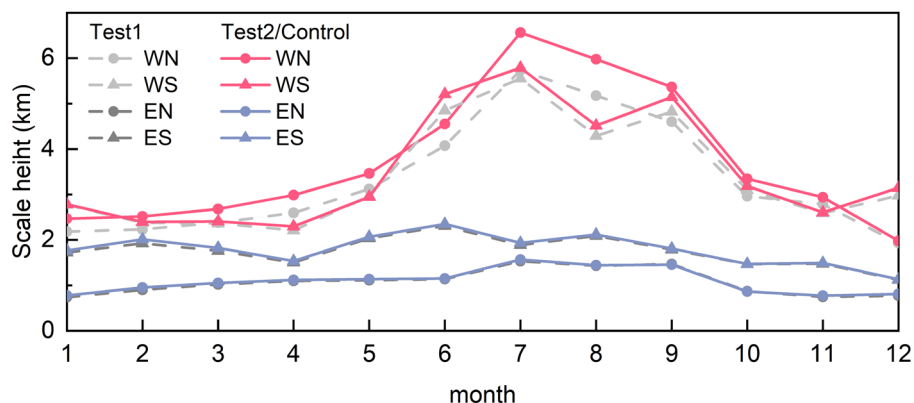

10

**Figure S1. Comparison of monthly scale height ( $1/X$ ) among three DDA-based setups for each subregion. Test1, Test2, and Control setups are the same as defined in Table S1. The  $X$  values are identical for Test2 and the Control setup because both share the same components in the modified DDA framework with variable  $\text{NO}_x/\text{NO}_2$  ratio.**

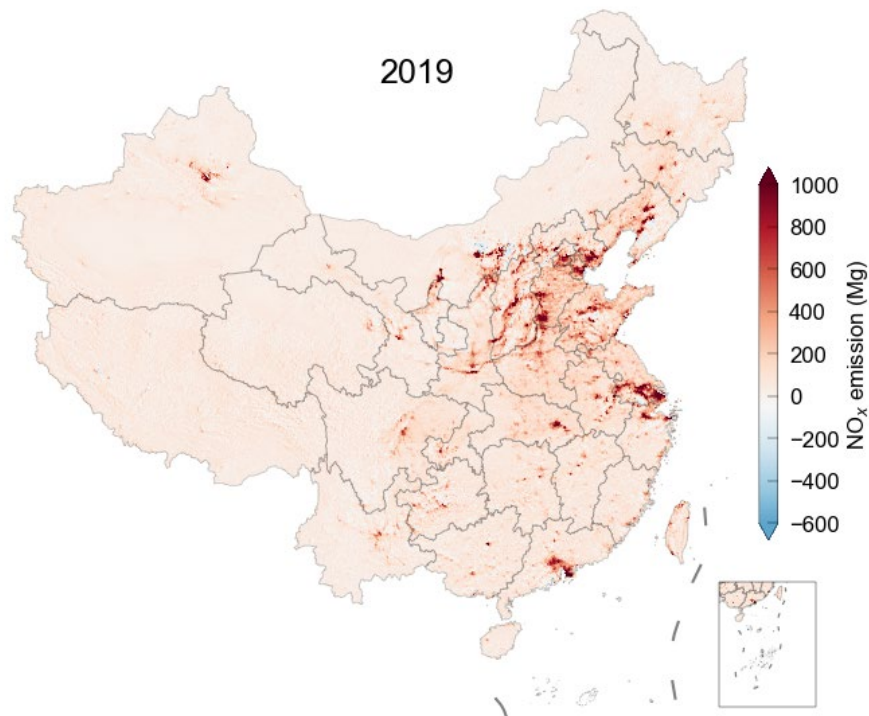

15 Figure S2. Spatial distribution of total NO<sub>x</sub> emissions in China for 2019.

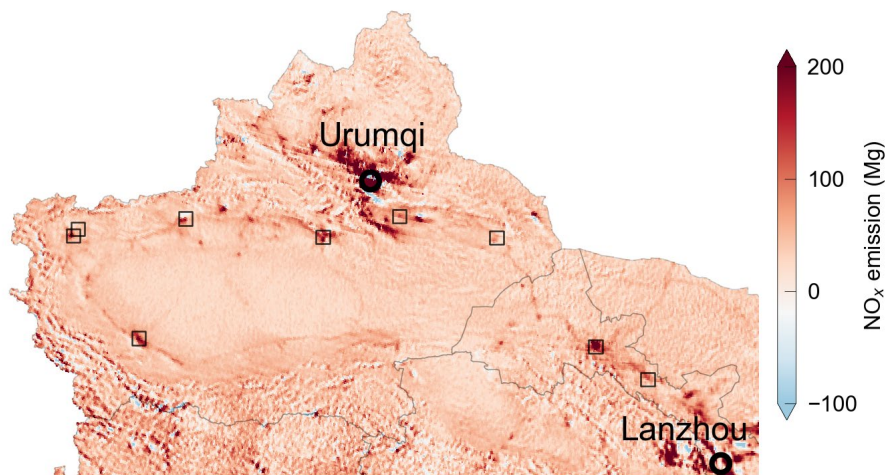

Figure S3. As Fig. S2 but for Northwest China. Urumqi and Lanzhou are major cities in Northwest China, with other cities mark by hollow square symbols. The linear trajectories reflect the transportation routes that connect them.

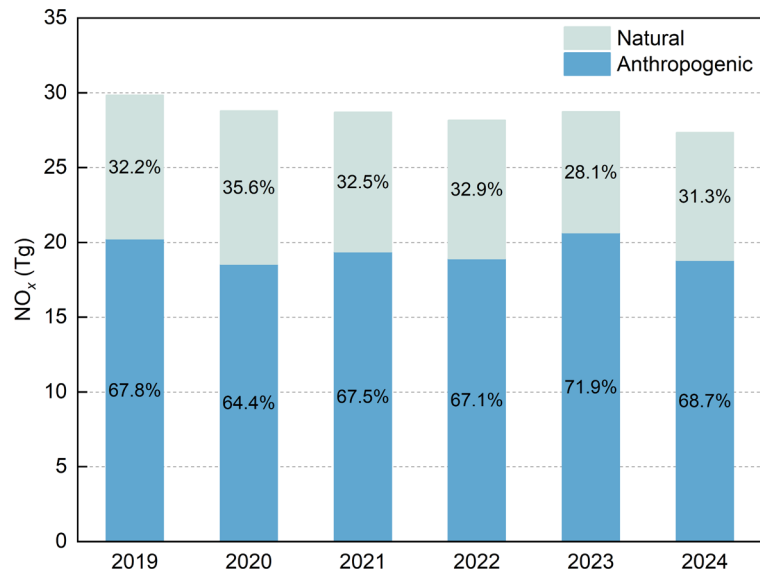

Figure S4. The proportion of anthropogenic and natural NO<sub>x</sub> relative to total NO<sub>x</sub> emissions in China for 2019–2024.

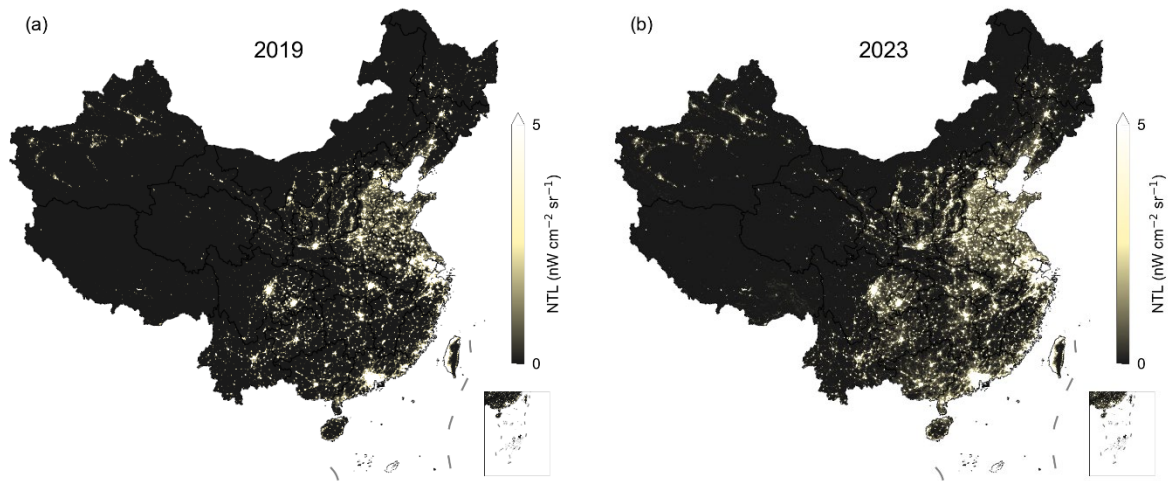

Figure S5. Nighttime Light (NTL) from SNPP/VIIRS in China for (a) 2019 and (b) 2023.

**Table S2. NO<sub>x</sub> emissions from sensitivity tests of the anthropogenic NO<sub>x</sub> filter threshold.**

- This work (NTL\_0.01): Grid cells with either the highest averaged NO<sub>2</sub> TVCDs in summer or the lowest values in winter comparing to other seasons, and with NTL < 0.01 nW cm<sup>-2</sup> sr<sup>-1</sup>, are subtracted as natural NO<sub>x</sub> (NO<sub>x</sub>\_nat), and for the remaining grid cells, soil and biomass burning emissions (from CAMS data) are further subtracted to obtain anthropogenic NO<sub>x</sub> (NO<sub>x</sub>\_anthro);
- NTL\_none: Same as this work, but without applying the NTL filter;
- NTL\_0.00: Same as this work, but with NTL = 0.00 nW cm<sup>-2</sup> sr<sup>-1</sup>;
- NTL\_0.05: Same as this work, but with NTL < 0.05 nW cm<sup>-2</sup> sr<sup>-1</sup>;
- 35 CAMS\_none: Same as this work, but soil and biomass burning emissions from CAMS data are not subtracted;
- NTL\_anthro: Fraction of NTL grids that are also classified as anthropogenic NO<sub>x</sub> grids.

| Year | Variable                     | Test                 |          |          |          |           |
|------|------------------------------|----------------------|----------|----------|----------|-----------|
|      |                              | This work (NTL_0.01) | NTL_none | NTL_0.00 | NTL_0.05 | CAMS_none |
| 2019 | NO <sub>x</sub> _anthro (Tg) | 20.2                 | 18.9     | 20.7     | 19.7     | 21.3      |
|      | NO <sub>x</sub> _nat (Tg)    | 9.6                  | 11.0     | 9.2      | 10.1     | 9.6       |
|      | NTL_anthro (%)               | 93.0                 | 77.4     | 100.0    | 85.5     | 93.0      |
| 2020 | NO <sub>x</sub> _anthro (Tg) | 18.5                 | 17.3     | 18.9     | 18.1     | 19.6      |
|      | NO <sub>x</sub> _nat (Tg)    | 10.3                 | 11.5     | 9.9      | 10.7     | 10.3      |
|      | NTL_anthro (%)               | 93.5                 | 78.1     | 100.0    | 86.7     | 93.5      |
| 2021 | NO <sub>x</sub> _anthro (Tg) | 19.4                 | 18.3     | 19.7     | 19.0     | 20.5      |
|      | NO <sub>x</sub> _nat (Tg)    | 9.3                  | 10.4     | 9.0      | 9.7      | 9.3       |
|      | NTL_anthro (%)               | 94.1                 | 81.6     | 100.0    | 88.1     | 94.1      |
| 2022 | NO <sub>x</sub> _nat (Tg)    | 18.9                 | 17.2     | 19.4     | 18.3     | 20.0      |
|      | NO <sub>x</sub> _nat (Tg)    | 9.3                  | 11.0     | 8.8      | 9.9      | 9.3       |
|      | NTL_anthro (%)               | 93.2                 | 74.7     | 100.0    | 85.0     | 93.2      |
| 2023 | NO <sub>x</sub> _anthro (Tg) | 20.7                 | 17.7     | 21.3     | 19.8     | 21.8      |
|      | NO <sub>x</sub> _nat (Tg)    | 8.1                  | 11.0     | 7.4      | 9.0      | 8.1       |
|      | NTL_anthro (%)               | 92.6                 | 66.9     | 100.0    | 83.0     | 92.6      |
| 2024 | NO <sub>x</sub> _anthro (Tg) | 18.8                 | 16.0     | 19.5     | 17.9     | 19.9      |
|      | NO <sub>x</sub> _nat (Tg)    | 8.5                  | 11.4     | 7.9      | 9.5      | 8.5       |
|      | NTL_anthro (%)               | 92.0                 | 67.4     | 100.0    | 82.0     | 92.0      |

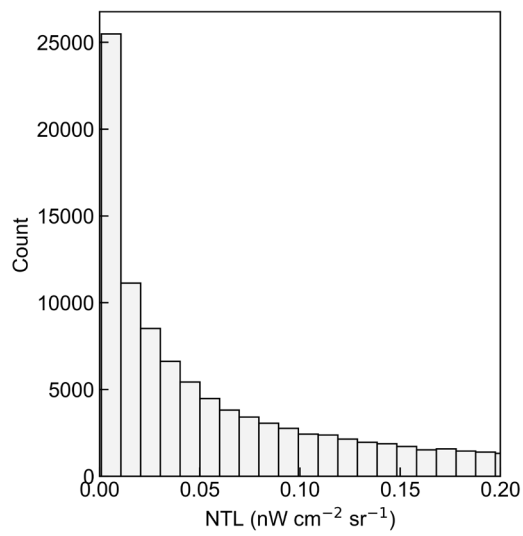

40

**Figure S6. Probability density function (PDF) of SNPP/VIIRS Nighttime Light (NTL) in China in 2023.**

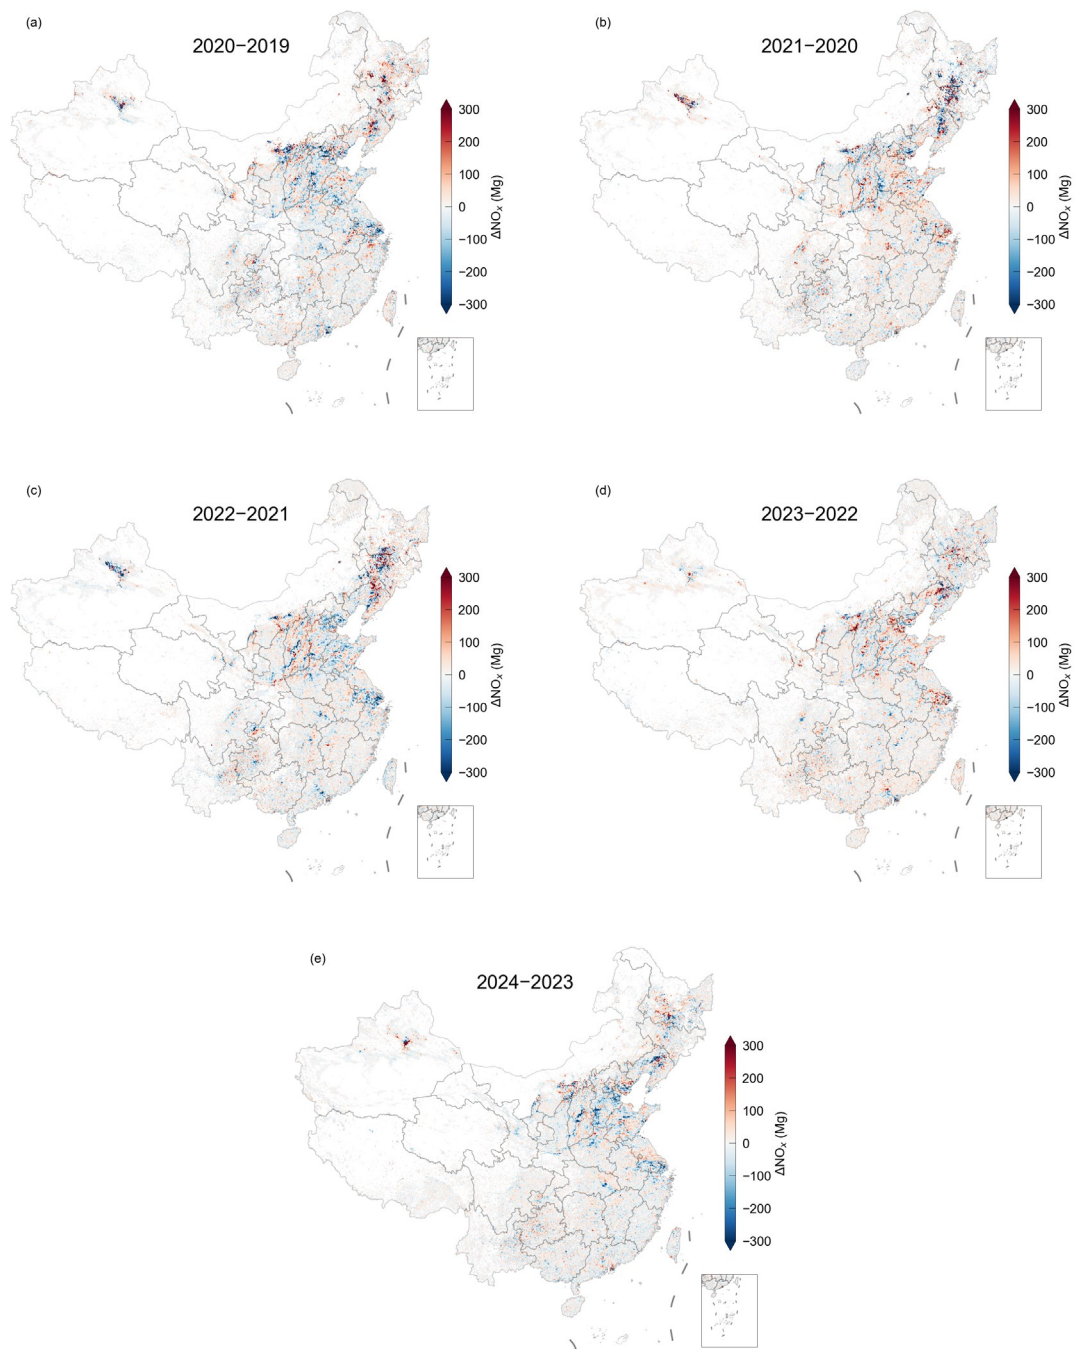

**Figure S7. Spatial distribution of year-on-year changes in anthropogenic NO<sub>x</sub> emissions in China for (a) 2020–2019, (b) 2021–2020, (c) 2022–2021, (d) 2023–2022, and (e) 2024–2023.**

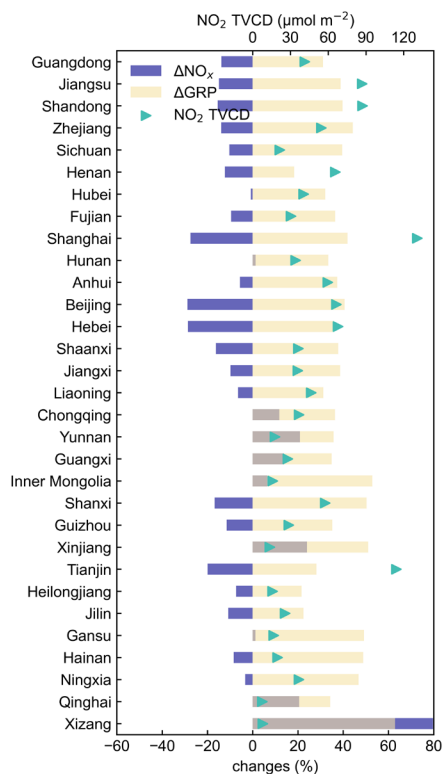

50 **Figure S8. Changes in provincial  $\text{NO}_x$  emissions, Gross Regional Product (GRP) and  $\text{NO}_2$  TVCDs in China from 2019 to 2024.**

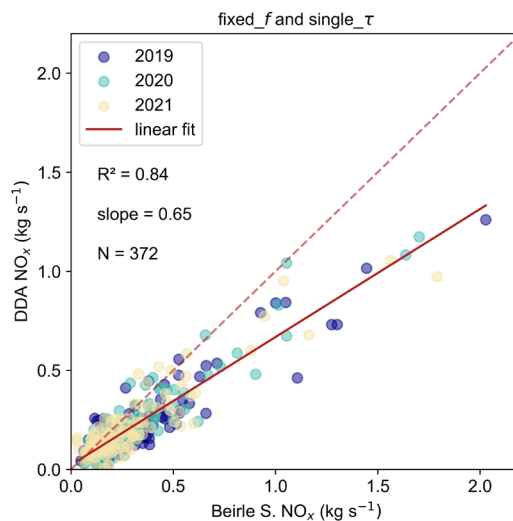

**Figure S9. Comparisons of  $\text{NO}_x$  point source emission rates between the DDA test without ratio correction and fitting scheme improvement (fixed  $f$  and single  $\tau$ ) and Beirle et al. (2023) data.**

**Table S3. Description of variables in the dataset.**

| Name                      | Description                                             | Dimensions | Units                                | Fill_value |
|---------------------------|---------------------------------------------------------|------------|--------------------------------------|------------|
| lat                       | Latitude                                                | lat        | degrees_north                        | NaN        |
| lon                       | Longitude                                               | lon        | degrees_east                         | NaN        |
| grid_area                 | Grid-cell area                                          | lat × lon  | m <sup>2</sup>                       | NaN        |
| NO <sub>x</sub> _emission | Annual anthropogenic NO <sub>x</sub> emissions per grid | lat × lon  | tonnes (1 tonne =10 <sup>3</sup> kg) | NaN        |
